# Supplementary material for: The Safety of Consuming Water Dropwort Used to Purify Livestock Wastewater Considering Accumulated Antibiotics and Antibiotic Resistance Genes
Source: MDPI journal article supplement (doi:10.3390/antibiotics11040428), 2022-03-23
Supplement: s1 [file s1]

*Supplementary materials of the article:*

## The Safety of Consuming Water Dropwort Used to Purify Livestock Wastewater Considering Accumulated Antibiotics and Antibiotic Resistance Genes

Dongrui Yao <sup>1,†</sup>, Yajun Chang <sup>1,†</sup>, Wei Wang <sup>1</sup>, Linhe Sun <sup>1</sup>, Jixiang Liu <sup>1</sup>, Huijun Zhao <sup>2</sup> and Weiguo Zhang <sup>3,\*</sup>

<sup>1</sup> Jiangsu Key Laboratory for the Research and Utilization of Plant Resources, Institute of Botany, Jiangsu Province and Chinese Academy of Sciences (Nanjing Botanical Garden Mem. Sun Yat-Sen), Nanjing 210014, China; yaodongrui@cnbg.net (D.Y.); changyj@cnbg.net (Y.C.); izjwang@163.com (W.W.); linhesun@cnbg.net (L.S.); ljx891654338@163.com (J.L.)

<sup>2</sup> College of Geography and Environmental Science, Northwest Normal University, Lanzhou 730070, China; zhaohj0707@163.com (H.Z.)

<sup>3</sup> Institute of Agricultural Resources and Environment, Jiangsu Academy of Agricultural Sciences, Nanjing 210014, China

\* Correspondence: weiguo Zhang@jaas.ac.cn; Tel: +86-25-2584390581.

† These authors contributed equally to this work.

**Citation:** Yao, D.; Chang, Y.; Wang, W.; Sun, L.; Liu, J.; Zhao, H.; Zhang, W. The Safety of Consuming Water Dropwort Used to Purify Livestock Wastewater Considering Accumulated Antibiotics and Antibiotic Resistance Genes. *Antibiotics* **2022**, *11*, 428. <https://doi.org/10.3390/antibiotics11040428>

Academic Editors: Paul I. Kadetz and Thérèse Hesketh

Received: 23 January 2022

Accepted: 19 March 2022

Published: 23 March 2022

**Publisher's Note:** MDPI stays neutral with regard to jurisdictional claims in published maps and institutional affiliations.

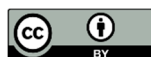

**Copyright:** © 2022 by the authors. Licensee MDPI, Basel, Switzerland. This article is an open access article distributed under the terms and conditions of the Creative Commons Attribution (CC BY) license (<https://creativecommons.org/licenses/by/4.0/>).

**Table S1.** The concentrations of antibiotics in livestock wastewater and water dropwort. Different letters indicate significant differences between livestock wastewater, roots, and stems/leaves ( $p < 0.05$ ).

| Antibiotic concentration (ng g <sup>-1</sup> ) | Wastewater                 | Root                       | Stem/leaf                  |
|------------------------------------------------|----------------------------|----------------------------|----------------------------|
| Sulfamethazine                                 | 0.043 ± 0.003 <sup>a</sup> | 0.148 ± 0.012 <sup>b</sup> | 0.132 ± 0.009 <sup>b</sup> |
| Oxytetracycline                                | 0.238 ± 0.012 <sup>a</sup> | 6.719 ± 0.56 <sup>b</sup>  | 3.149 ± 0.231 <sup>c</sup> |
| Doxycycline                                    | 0.341 ± 0.025 <sup>a</sup> | 10.390 ± 0.71 <sup>b</sup> | 2.892 ± 0.110 <sup>c</sup> |
| Tetracycline                                   | 0.326 ± 0.033 <sup>a</sup> | 9.779 ± 0.762 <sup>b</sup> | 2.603 ± 0.217 <sup>c</sup> |
| Chlortetracycline                              | 0.305 ± 0.019 <sup>a</sup> | 3.857 ± 0.193 <sup>b</sup> | 4.254 ± 0.266 <sup>b</sup> |
| Azithromycin                                   | 0.031 ± 0.007 <sup>a</sup> | 0.179 ± 0.009 <sup>b</sup> | 0.182 ± 0.013 <sup>b</sup> |
| Tylosin                                        | 0.065 ± 0.013 <sup>a</sup> | 0.898 ± 0.127 <sup>b</sup> | 0.973 ± 0.119 <sup>b</sup> |

**Table S2.** The antibiotics enrichment capacities of roots and stems/leaves. Different letters indicate significant differences between livestock wastewater, roots, and stems/leaves ( $p < 0.05$ ). BAF =  $C_{\text{plant}}/C_{\text{wastewater}}$ , where  $C_{\text{plant}}$  is the concentration of roots or stems/leaves, and  $C_{\text{wastewater}}$  is the concentration of livestock wastewater.

| BAF               | Root                       | Stem/leaf                   |
|-------------------|----------------------------|-----------------------------|
| Sulfamethazine    | 3.424 ± 0.231 <sup>a</sup> | 3.036 ± 0.173 <sup>a</sup>  |
| Oxytetracycline   | 28.233 ± 1.23 <sup>a</sup> | 13.233 ± 0.557 <sup>b</sup> |
| Doxycycline       | 30.469 ± 2.91 <sup>a</sup> | 8.481 ± 1.16 <sup>b</sup>   |
| Tetracycline      | 30.023 ± 3.62 <sup>a</sup> | 7.990 ± 1.44 <sup>b</sup>   |
| Chlortetracycline | 12.651 ± 1.79 <sup>a</sup> | 13.954 ± 2.01 <sup>a</sup>  |
| Azithromycin      | 5.795 ± 0.893 <sup>a</sup> | 5.863 ± 0.672 <sup>a</sup>  |
| Tylosin           | 13.818 ± 1.21 <sup>a</sup> | 14.968 ± 0.966 <sup>a</sup> |
